# Supplementary material
Source: PubMed Central journal article supplement (PMC3288198)
Supplement: NIHMS337553-supplement-2_si_002.pdf [file NIHMS337553-supplement-2_si_002.pdf]

|        | Ebselen          |                | NSC-95397        |                | U-73122          |                | GNTI             |                | Aurothioglucose  |                |
|--------|------------------|----------------|------------------|----------------|------------------|----------------|------------------|----------------|------------------|----------------|
|        | IC <sub>50</sub> | K <sub>i</sub> |
| HDAC1  | 1.5 ± 0.4        | 0.15           | >180             | N/A            | 38.4 ± 15.5      | 4.11           | 30.2 ± 7.3       | 3.24           | 4.4 ± 1.1        | 0.47           |
| HDAC2  | 1.4 ± 0.3        | 0.08           | >100             | N/A            | >100             | N/A            | 26.2 ± 7.6       | 1.48           | >180             | N/A            |
| HDAC3  | 2.1 ± 1.5        | 0.23           | >100             | N/A            | 6.2 ± 4.0        | 0.66           | 22.7 ± 3.1       | 2.43           | 11.5 ± 3.2       | 1.23           |
| HDAC4  | 1.2 ± 0.2        | 0.20           | 7.2 ± 2.8        | 1.23           | 31.2 ± 0.2       | 5.33           | 13.4 ± 1.6       | 2.29           | 4.1 ± 2.1        | 0.7            |
| HDAC5  | 0.78 ± 0.1       | 0.42           | 3.1 ± 0.2        | 1.68           | 10.5 ± 7.4       | 5.68           | 0.70 ± 0.1       | 0.38           | 0.72 ± 0.5       | 0.39           |
| HDAC6  | 12.8 ± 2.6       | 3.10           | 12.7 ± 2.5       | 3.07           | 45.2 ± 12.6      | 10.96          | >180             | N/A            | 14.4 ± 5.8       | 3.49           |
| HDAC7  | 10.9 ± 2.2       | 3.09           | 13.1 ± 4.3       | 3.72           | >180             | N/A            | 18.9 ± 1.0       | 5.36           | 22.4 ± 4.4       | 6.35           |
| HDAC8  | 0.35 ± 0.2       | 0.11           | 1.3 ± 0.1        | 1.03           | 10.9 ± 3.1       | 8.63           | 2.0 ± 0.4        | 1.58           | 1.4 ± 0.3        | 1.11           |
| HDAC9  | 0.97 ± 0.5       | 0.20           | 4.8 ± 1.4        | 2.04           | 29.8 ± 5.6       | 12.67          | 12.3 ± 1.7       | 5.23           | 2.8 ± 0.1        | 1.19           |
| HDAC10 | 0.95 ± 0.4       | 0.42           | 14.5 ± 1.5       | 6.40           | >100             | N/A            | >180             | N/A            | 4.9 ± 1.5        | 2.16           |
| HDAC11 | 22.5 ± 2.4       | 4.41           | 37.8 ± 1.4       | 7.41           | >180             | N/A            | >180             | N/A            | >180             | N/A            |

**Table 1. HDAC inhibition IC<sub>50</sub> and K<sub>i</sub> for the five LOPAC hit compounds.** The IC<sub>50</sub> values lower than 100 μM were determined from at least two independent titrations (Supporting Information). The IC<sub>50</sub> values were converted to K<sub>i</sub> using Cheng-Prusoff equation assuming classical inhibitory mechanism.
